# Supplementary material for: Structure of Signal-regulatory Protein α: A LINK TO ANTIGEN RECEPTOR EVOLUTION
Source: PubMed Central journal article supplement — J Biol Chem. 2009 Jul 23;284(39):26613–9. doi: 10.1074/jbc.M109.017566 (PMC2785349; doi:10.1074/jbc.m109.017566), 2009-07-23
Supplement: supp_M109.017566_jbc.M109.017566-1.pdf [file supp_M109.017566_jbc.M109.017566-1.pdf]

## Supplementary Figure Legend

**Figure S1. Flexibility of the SIRP $\alpha$  N-terminal domain.** Seven crystallographically-independent structures of the N-terminal domain of SIRP $\alpha$  are shown in series, highlighting the flexibility of the CC' loop and of the CD47-interacting BC, C'D, DE and FG loops. The structures were overlain using Theseus (1) and are colour-ramped from blue (residue 3) to red (residue 114).

1. Theobald, D. L., and Wuttke, D. S. (2006) *Bioinformatics* **22**, 2171-2172
